# Supplementary material for: Multiplexed, targeted profiling of single-cell proteomes and transcriptomes in a single reaction
Source: PubMed Central journal article supplement (PMC5027636; doi:10.1186/s13059-016-1045-6), 2016-09-19

FIGURE S4

A

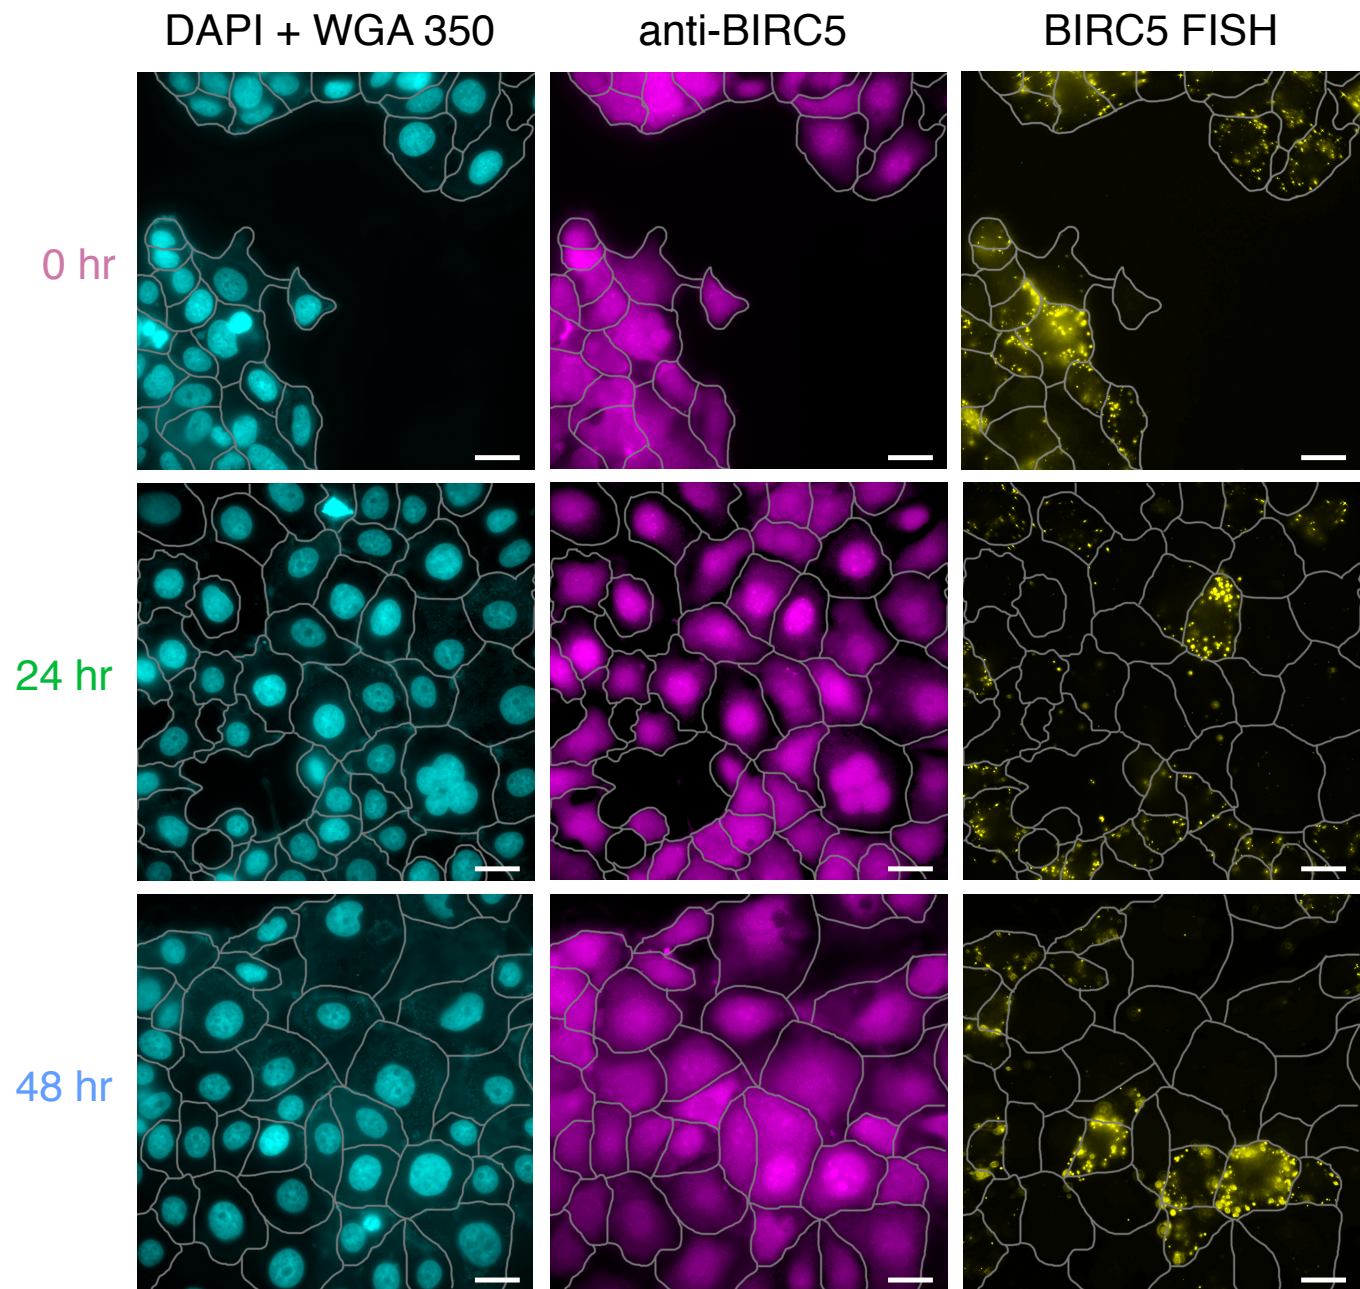

B

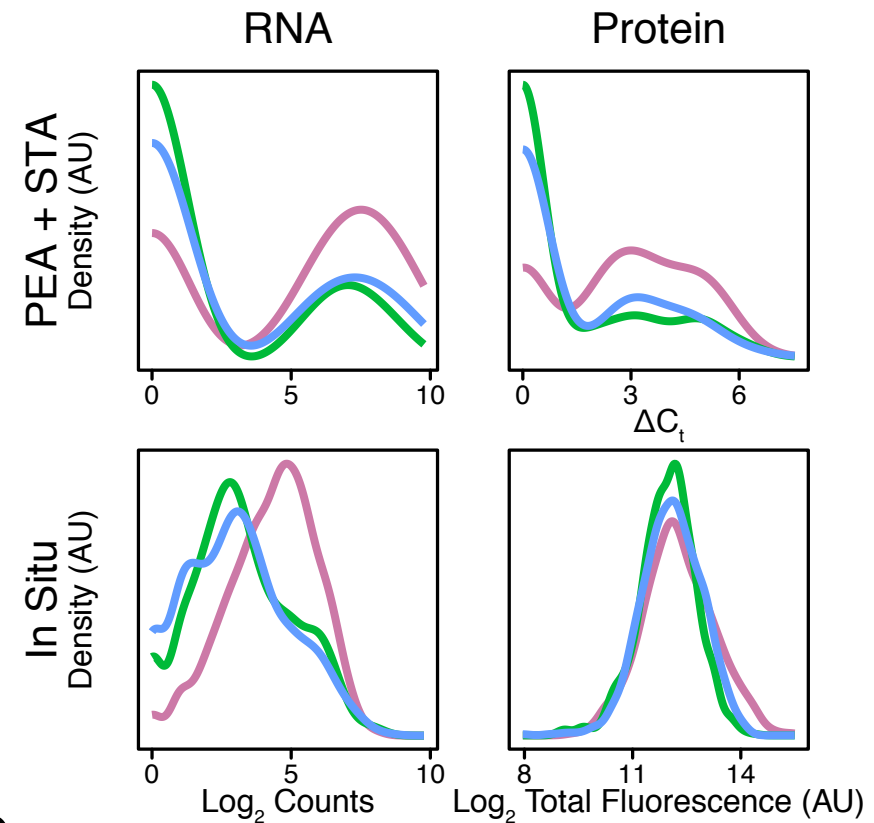

C

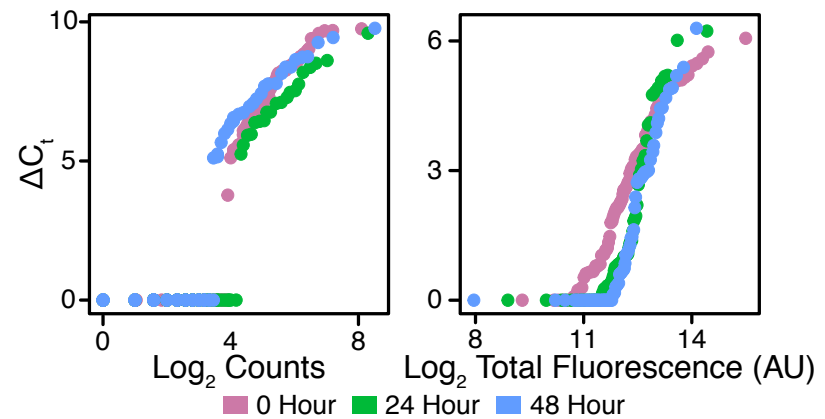

Supplement: 13059_2016_1045_MOESM5_ESM.pdf [file 13059_2016_1045_MOESM5_ESM.pdf]
